# Supplementary material for: A TFEB nuclear export signal integrates amino acid supply and glucose availability
Source: PubMed Central journal article supplement (PMC6041281; doi:10.1038/s41467-018-04849-7), 2018-07-11
Supplement: 41467_2018_4849_MOESM1_ESM.pdf [file 41467_2018_4849_MOESM1_ESM.pdf]

## **Supplementary Information**

### **A TFEB nuclear export signal integrates amino acid supply and glucose availability**

**Li et al**

**Supplementary Figure 1**

**Supplementary Figure 2**

**Supplementary Table 1**

**Supplementary Table 2**

**Supplementary Table 3**

**Supplementary Table 4**

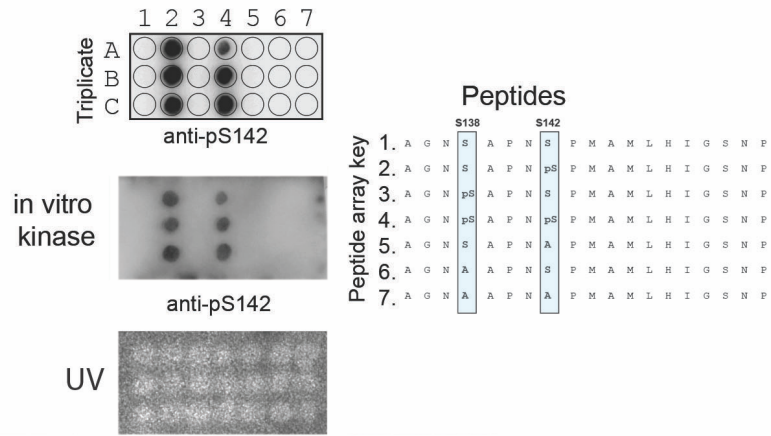

**Supplementary Figure 1**

Validation of commercial antibody (Sigma-Adrich SAB4503940) recognising TFEB phospho-S142 using indicated peptide dot blot



**Supplementary Table 1.**

Summary for quantification of fluorescent images

|                   | n (Number of Cells/ <i>Lysosomes</i> ) | Number of Technical Replicates | Number of Biological Replicates | Statistical Test |
|-------------------|----------------------------------------|--------------------------------|---------------------------------|------------------|
| Figure 1 a        | 113                                    | 3~4                            | 1                               | t test           |
| Figure 1 c        | 114                                    | 3                              | 1                               | t test           |
| Figure 1 d        | 35                                     | 4~5                            | 1                               | t test           |
| Figure 1 e (left) | 160                                    | 4~5                            | 2                               | t test           |
| Figure 1 e(right) | 9596                                   | 3                              | 3                               | t test           |
| Figure 2 a        | 288                                    | 2                              | 1                               | t test           |
| Figure 2 c        | 3952                                   | 3                              | 2                               | t test           |
| Figure 3 a        | 4153                                   | 3                              | 2                               | t test           |
| Figure 3 c        | 14120                                  | 3                              | 3                               | t test           |
| Figure 3 f        | 1484                                   | 10                             | 3                               | t test           |
| Figure 4 a        | 1740                                   | 3                              | 2                               | t test           |
| Figure 5 a        | 4874                                   | 3                              | 3                               | t test           |
| Figure 5 c        | 1433                                   | 5~10                           | 3                               | t test           |
| Figure 5 e        | 1038                                   | 3~5                            | 4                               | t test           |
| Figure 6 a        | 2202                                   | 1                              | 5                               | t test           |
| Figure 6 b        | 926                                    | 3~6                            | 2                               | t test           |
| Figure 6 e        | 1151                                   | 2                              | 3                               | t test           |
| Figure 6 g        | 36516                                  | 3                              | 3                               | t test           |
| Figure 6 i        | 9132                                   | 5                              | 3                               | t test           |
| Figure 6 k        | 6081                                   | 5~10                           | 3                               | t test           |

**Supplementary Table 2**  
Summary of antibodies used

| <b>Antibody</b>                                                          | <b>Immunogen</b>                                                        | <b>Source (Catalogue)</b> | <b>Dilution (Application)</b> |
|--------------------------------------------------------------------------|-------------------------------------------------------------------------|---------------------------|-------------------------------|
| $\alpha$ -actin (AC-40)<br>mouse monoclonal                              | C-terminus                                                              | Sigma-Aldrich<br>A4700    | 1:1000 (WB)                   |
| $\alpha$ -HA (HA-7)<br>mouse monoclonal                                  | Residues 98-106 (YPYDVPDYA) of human Influenza virus hemagglutinin (HA) | Sigma-Aldrich<br>H3663    | 1:500 (IF)                    |
| $\alpha$ -ERK (C-14)<br>rabbit polyclonal                                | C-terminus                                                              | Santa Cruz<br>sc-154      | 1:10000 (WB)                  |
| $\alpha$ -GAPDH<br>rabbit polyclonal                                     | Residues 314-333                                                        | Sigma-Aldrich<br>G9545    | 1:20000 (WB)                  |
| $\alpha$ -GFP<br>rabbit polyclonal                                       | Full-length GFP                                                         | Abcam<br>ab290            | 1:20000 (WB)<br>1:1000 (IF)   |
| $\alpha$ -H3<br>rabbit polyclonal                                        | Residue 100 to C-terminus                                               | Abcam<br>ab1791           | 1:2,000 (WB)                  |
| $\alpha$ -p70 S6 Kinase (C-18)<br>rabbit polyclonal                      | C-terminus                                                              | Santa Cruz<br>sc-230      | 1:1000 (WB)                   |
| $\alpha$ -S6 Ribosomal Protein (5G10)<br>rabbit monoclonal               | Residues of human S6 ribosomal protein                                  | Cell Signaling<br>2217    | 1:1000 (WB)                   |
| $\alpha$ -phospho ERK1/2 (T202/Y204)<br>rabbit polyclonal                | Region surrounding T202/Y204                                            | Cell Signaling<br>4377    | 1:1000 (WB)                   |
| $\alpha$ -phospho p70 S6 Kinase (T389)<br>rabbit polyclonal              | Region around T389                                                      | Cell Signaling<br>9205    | 1:1000 (WB)                   |
| $\alpha$ -phospho-S6 Ribosomal Protein (Ser235/236)<br>rabbit polyclonal | Residues surrounding Ser235 and Ser236 of human ribosomal protein S6    | Cell Signaling<br>2211    | 1:1000 (WB)                   |
| $\alpha$ -TFEB<br>rabbit polyclonal                                      | Region surrounding G412                                                 | Cell Signaling<br>4240    | 1:1000 (WB)<br>1:250 (IF)     |
| $\alpha$ -phospho-Akt (Ser473)<br>rabbit polyclonal                      | Residues surrounding Ser473 of mouse Akt                                | Cell Signaling<br>9271    | 1:2000 (WB)                   |
| $\alpha$ -Akt<br>rabbit polyclonal                                       | C-terminal of mouse Akt                                                 | Cell Signaling<br>9272    | 1:2000 (WB)                   |
| $\alpha$ -phospho-GSK3 $\beta$ (S9)<br>rabbit polyclonal                 | Residues surrounding S9 of human GSK3                                   | Cell Signaling<br>9336    | 1:2000 (WB)                   |
| $\alpha$ -GSK3 $\alpha/\beta$ (21A)<br>mouse monoclonal                  | Full length <i>Xenopus laevis</i> GSK3                                  | Invitrogen<br>44-610      | 1:2000 (WB)                   |
| $\alpha$ -RICTOR (7B3)<br>mouse monoclonal                               | Full length Rictor                                                      | Abnova<br>MAB10313        | 1:1000(WB)<br>1:100 (IF)      |
| $\alpha$ -phospho-IRS-1 (S302)<br>rabbit polyclonal                      | Residues surrounding Ser 302 of mouse IRS-1                             | Cell Signaling<br>2384    | 1:1000 (WB)                   |

|                                                                                    |                                                                                          |                          |             |
|------------------------------------------------------------------------------------|------------------------------------------------------------------------------------------|--------------------------|-------------|
| $\alpha$ -phospho-IRS-1 (S1101)<br>rabbit polyclonal                               | Residues surrounding Ser1101 of human IRS-1                                              | Cell Signaling 2385      | 1:1000 (WB) |
| $\alpha$ -IRS-1<br>rabbit polyclonal                                               | Carboxy-terminal sequence of human IRS-1                                                 | Cell Signaling 2382      | 1:1000 (WB) |
| $\alpha$ -phospho-ULK1 (S757)<br>rabbit polyclonal                                 | Residues surrounding Ser757 of mouse ULK1                                                | Cell Signaling 6888      | 1:1000 (WB) |
| $\alpha$ -ULK1 (D8H5)<br>rabbit monoclonal                                         | Residues surrounding Arg600 of human ULK1                                                | Cell Signaling 8054      | 1:1000 (WB) |
| $\alpha$ -SGK1<br>rabbit polyclonal                                                | Residues surrounding Gly420 of human SGK1                                                | Cell Signaling 12103     | 1:1000 (WB) |
| $\alpha$ -LC3B<br>rabbit polyclonal                                                | Residues near the amino terminus of LC3B                                                 | Cell Signaling #2775     | 1:1000 (WB) |
| $\alpha$ -phospho-MITF (pSer130/73)/<br>phospho-TFEB (Ser142)<br>Rabbit polyclonal | Synthesized peptide derived from human MITF around the phosphorylation site of Ser180/73 | Sigma-Aldrich SAB4503940 | 1:5000 (WB) |
| $\alpha$ -RAN<br>Mouse monoclonal                                                  | Human Ran aa. 7-171                                                                      | BD Biosciences #610341   | 1:1000 (WB) |
| $\alpha$ -CRM1<br>Goat polyclonal                                                  | C-terminal 20 aa of human CRM1                                                           | Santa Cruz # sc-7825     | 1:2000 (WB) |

**Supplementary Table 3**  
Summary of oligonucleotides used

All oligonucleotides were made by Integrated DNA Technologies (Leuven, Belgium).

| Use                       | Details                                                         | Sequence                                    |
|---------------------------|-----------------------------------------------------------------|---------------------------------------------|
| Cloning                   | Clone human TFEB residues 1-159 into nlsCARGO, AgeI, forward    | CTAGACCGGTGCCACCATGGCGTC<br>ACGCATAGGGTTGCG |
| Cloning                   | Clone human TFEB residues 1-159 into nlsCARGO, AgeI, reverse    | CTAGACCGGTATATCATCCAATC<br>CCTCTCAGGGTTGG   |
| Cloning                   | Clone human TFEB residues 129-152 into nlsCARGO, EcoRI, forward | CTAGGAATTCACACGTGCTGTCCT<br>CCTCCGCTG       |
| Cloning                   | Clone human TFEB residues 129-152 into nlsCARGO, KpnI, reverse  | CTAGGGTACCGTTGGAGCCAATGT<br>GCAGCATGG       |
| Cloning                   | Clone TFEB-GFP into pPB-iCMV-MCS, SacII, forward                | CTAGCCGCGGGCCACCATGGCGTC<br>ACGC            |
| Cloning                   | Clone TFEB-GFP into pPB-iCMV-MCS, NotI, reverse                 | CTAGGCGGCCGCTCACAGCACATC<br>GCC             |
| Cloning                   | Clone 3xHA-GSK3 $\beta$ into pPB-iCMV-MCS, EcoRI, forward       | GCTAGAATTCGCCACCATGTCAGG<br>GCGGCCAG        |
| Cloning                   | Clone 3xHA-GSK3 $\beta$ into pPB-iCMV-MCS, NotI, reverse        | GCTAGCGCCGCCTAGTTGGGACC<br>ACCCAAGCT        |
| Site-directed mutagenesis | TFEB S138A mutagenesis forward                                  | CCTCCGCTGGCAACGCTGCTCCCA<br>ATAGCC          |
| Site-directed mutagenesis | TFEB S138A mutagenesis reverse                                  | GGCTATTGGGAGCAGCGTTGCCAG<br>CGGAGG          |
| Site-directed mutagenesis | TFEB S142A mutagenesis forward                                  | TGGCAACAGTGCTCCCAATGCCCC<br>CATG            |
| Site-directed mutagenesis | TFEB S142A mutagenesis reverse                                  | GGCCATGGGGCATTGGGAGCACT<br>GTTG             |
| Site-directed mutagenesis | TFEB M144A mutagenesis forward                                  | GCTCCCAATAGCCCCGCGCCATG<br>CTGCACAT         |
| Site-directed mutagenesis | TFEB M144A mutagenesis reverse                                  | ATGTGCAGCATGGCCGCGGGGCTA<br>TTGGGAGC        |
| Site-directed mutagenesis | TFEB M146A mutagenesis forward                                  | CAATAGCCCCATGGCCGCGCTGCA<br>CATTGGCTCC      |
| Site-directed mutagenesis | TFEB M146A mutagenesis reverse                                  | GGAGCCAATGTGCAGCGCGCCAT<br>GGGGCTATTG       |
| Site-directed mutagenesis | TFEB L147A mutagenesis forward                                  | GCCCCATGGCCATGGCGCACATTG<br>GCTCCA          |
| Site-directed mutagenesis | TFEB L147A mutagenesis reverse                                  | TGGAGCCAATGTGCGCCATGGCCA<br>TGGGGC          |
| Site-directed mutagenesis | TFEB I149A mutagenesis forward                                  | CATGGCCATGCTGCACGCTGGCTC<br>CAACCCTGAG      |
| Site-directed mutagenesis | TFEB I149A mutagenesis reverse                                  | CTCAGGGTTGGAGCCAGCGTGCAG<br>CATGGCCATG      |
| Site-directed mutagenesis | TFEB S211A mutagenesis forward                                  | GTCACCAGCAGCGCCTGCCCTGCG<br>G               |
| Site-directed mutagenesis | TFEB S211A mutagenesis reverse                                  | CCGCAGGGCAGGCGCTGCTGGTGA<br>C               |

|                 |                                   |                       |
|-----------------|-----------------------------------|-----------------------|
| RT-PCR analysis | Human TFEB gene, forward          | CAAGGCCAATGACCTGGAC   |
| RT-PCR analysis | Human TFEB gene, reverse          | AGCTCCCTGGACTTTTGCAG  |
| RT-PCR analysis | Human GAPDH gene, forward         | TGCACCACCAACTGCTTAGC  |
| RT-PCR analysis | Human GAPDH gene, reverse         | TCTTCTGGGTGGCAGTGATG  |
| RT-PCR analysis | Human <i>CDKN1A</i> gene, forward | GGCAGACCAGCATGACAGATT |
| RT-PCR analysis | Human <i>CDKN1A</i> gene, reverse | GCGGATTAGGGCTTCCTCTT  |
| RT-PCR analysis | Human <i>RRAGD</i> gene, forward  | GTGACCAGGGCCTACAAAG   |
| RT-PCR analysis | Human <i>RRAGD</i> gene, reverse  | TTTGCCCTCTGGTGAATATCT |



#### Supplementary Table 4

Summary of plasmids used

Details of construction of all plasmids used are available on request

| <b>Construct</b>                      | <b>Comments</b>                                                     |
|---------------------------------------|---------------------------------------------------------------------|
| pEGFP-C1-TFEB                         | Addgene; GFP-tagged human TFEB                                      |
| pEGFP-C1-TFEB(S211A)                  | TFEB(S211A)-GFP                                                     |
| pEGFP-C1-TFEB(S142A)                  | TFEB(S142A)-GFP                                                     |
| pEGFP-C1-NLS-GST                      | GFP-NLS-GST cargo (nlsCARGO)                                        |
| pEGFP-C1-NLS-GST-NES                  | nlsCARGO with PKI NES (nlsCARGO-NES)                                |
| pEGFP-C1-NLS-GST-TFEB(1-159)          | nlsCARGO with TFEB residues 1-159                                   |
| pEGFP-C1-NLS-GST-TFEB(129-152)        | nlsCARGO with TFEB residues 129-152                                 |
| pEGFP-C1-NLS-GST-TFEB(1-159)(S142A)   | TFEB(1-159)(S142A)-nlsCARGO                                         |
| pEGFP-C1-NLS-GST-TFEB(129-152)(S142A) | TFEB(129-152)(S142A)-nlsCARGO                                       |
| pPB-iCMV-MCS                          | PiggyBac vector with Tet-On inducible system                        |
| pPB-iCMV-TFEB-GFP                     | TFEB-GFP in Tet-On with piggyBac transposon elements                |
| pPB-iCMV-TFEB(S138A)-GFP              | TFEB(S138A)-GFP in Tet-On with PiggyBac transposon elements         |
| pPB-iCMV-TFEB(S142A)-GFP              | TFEB(S142A)-GFP in Tet-On with PiggyBac transposon elements         |
| pPB-iCMV-TFEB(M144A)-GFP              | TFEB(M144A)-GFP in Tet-On with PiggyBac transposon elements         |
| pPB-iCMV-TFEB(M146A)-GFP              | TFEB(M146A)-GFP in Tet-On with PiggyBac transposon elements         |
| pPB-iCMV-TFEB(L147A)-GFP              | TFEB(L147A)-GFP in Tet-On with PiggyBac transposon elements         |
| pPB-iCMV-TFEB(I149A)-GFP              | TFEB(I149A)-GFP in Tet-On with PiggyBac transposon elements         |
| pPB-iCMV-TFEB(S211A)-GFP              | TFEB(S211A)-GFP in Tet-On with PiggyBac transposon elements         |
| pPB-iCMV-3xHA-GSK3 $\beta$ (S9A)      | 3xHA-GSK3 $\beta$ (S9A)in Tet-On with PiggyBac transposon elements  |
| pPB-iCMV-3xHA-GSK3 $\beta$ (K85A)     | 3xHA-GSK3 $\beta$ (K85A)in Tet-On with PiggyBac transposon elements |
| pmCherry-C1-RanQ69L                   | Addgene #30309, a gift from Jay Brenman                             |
| pmCherry-LacR-NLS                     | <sup>26</sup> Soutoglou, E. & Misteli                               |
