# Supplementary material for: A TFEB nuclear export signal integrates amino acid supply and glucose availability
Source: PubMed Central journal article supplement (PMC6041281; doi:10.1038/s41467-018-04849-7), 2018-07-11
Supplement: 41467_2018_4849_MOESM2_ESM.pdf [file 41467_2018_4849_MOESM2_ESM.pdf]

## Description of Additional Supplementary Files

**File Name:** Supplementary Movie 1

**Description:** Real time imaging of MCF7 iTFEB-GFP cells over 20 min. Cells corresponding to those shown in **Fig. 1b** are found in the bottom left corner.
